# Supplementary material for: Air and moisture stable covalently-bonded tin(ii) coordination polymers
Source: Royal Society of Chemistry journal article supplement (doi:10.1039/c8dt01370e), 2018-01-01

## Supplementary Information

**Figure S1:** TGA curves for **(1)** - **(4)**.

**Figure S2:**  $^{119}\text{Sn}$  Mossbauer spectra of **(1)** - **(4)**.

**Figure S3:** Powder X-ray diffractograms for **(1)** - **(4)**.

Figure S1. TGA curves for (1) - (4).

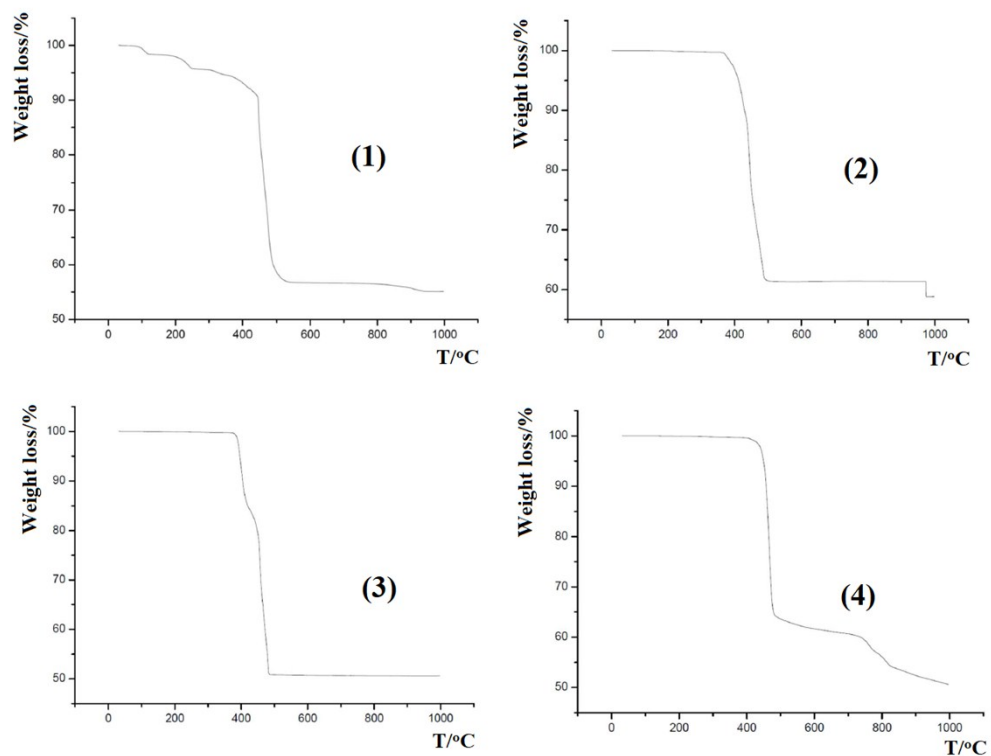

Expected mass losses for combustion of (1) – (4) to SnO<sub>2</sub>:

- (1) 38.2 %
- (2) 34.5 %
- (3) 49.7 %
- (4) 42.4 %

Figure S2.  $^{119}\text{Sn}$  Mossbauer spectra of (1) - (4).

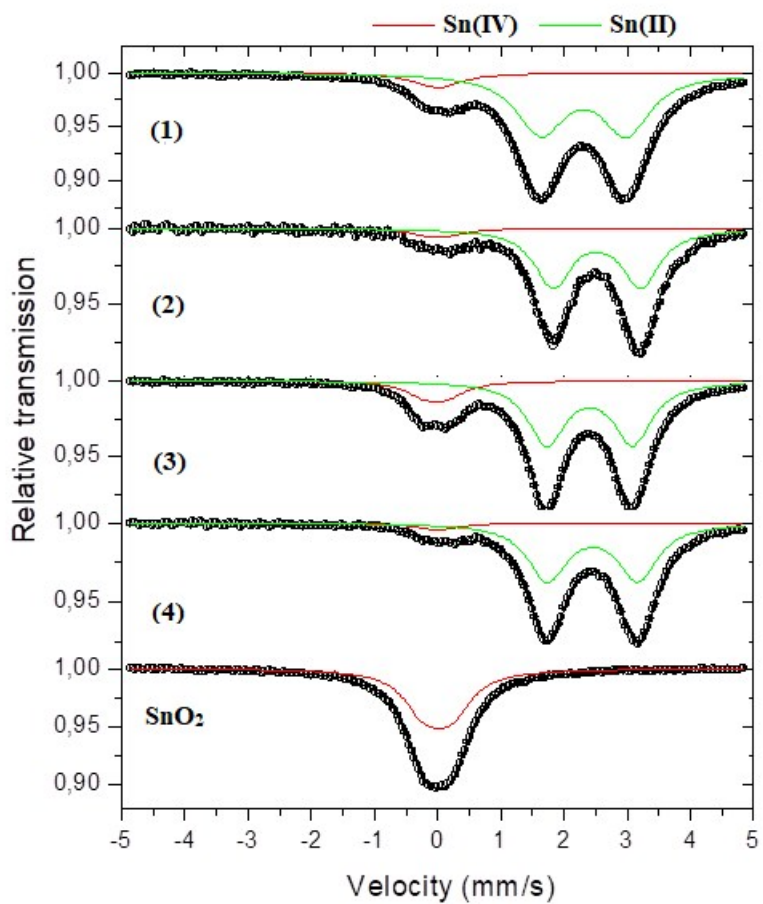

Figure S3. Powder X-ray diffractograms for (1) - (4).

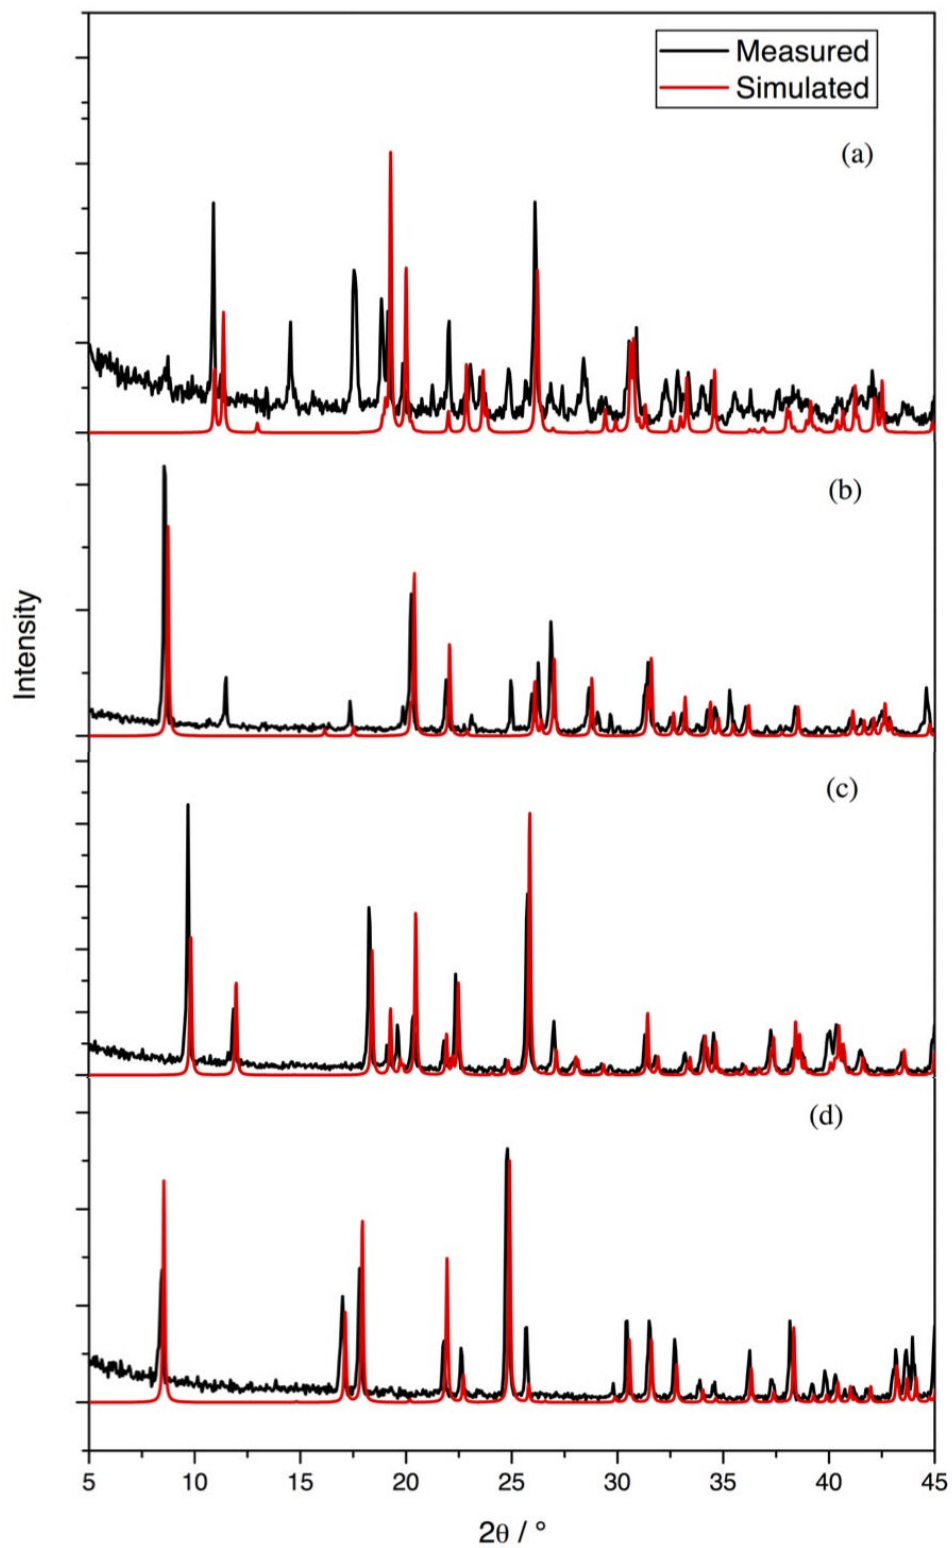

Supplement: c8dt01370e1.pdf [file c8dt01370e1.pdf]
