# Supplementary material for: Air and moisture stable covalently-bonded tin(ii) coordination polymers
Source: Royal Society of Chemistry journal article supplement (doi:10.1039/c8dt01370e), 2018-01-01
Supplement: c8dt01370e2.pdf [file c8dt01370e2.pdf]

### *Hirshfeld surface and supramolecular analyses*

Hirshfeld surfaces [1 - 6] for the repeating units of **(1)** - **(4)** mapped with  $d_{\text{norm}}$  and shape index are depicted in Figure S4. These maps were constructed from the CIF files using CrystalExplorer (Version 3.1) [7]. Contributions from specific pairs of atom-types are shown in Figure S5. According to our analysis,  $\text{H}\cdots\text{H}$ ,  $\text{C}\cdots\text{C}$ ,  $\text{H}\cdots\text{C}/\text{C}\cdots\text{H}$ , and  $\text{H}\cdots\text{O}/\text{O}\cdots\text{H}$  close contacts contribute 2.9, 1.2, 4.6, and 1.8% to the Hirshfeld surface for **(1)**, respectively (Figure S5). As already mentioned, the two-dimensional polymeric architecture of **(1)** grows parallel to the [001] direction and along the diagonal of the [100] direction. Adjacent polymeric chains are interconnected by  $\text{Sn}(1)\cdots\text{O}(2)$  (3.626 and 3.893 Å) interactions along the [010] direction (Figure S6). In fact, contribution of  $\text{O}\cdots\text{Sn}/\text{Sn}\cdots\text{O}$  close contacts to the Hirshfeld surface area for **(1)** is larger than that observed for **(2)** - **(4)** (Figure S5).

Hirshfeld surface analysis for **(2)** indicated that  $\text{H}\cdots\text{H}$  (1.1%) and  $\text{H}\cdots\text{C}/\text{C}\cdots\text{H}$  (4.6%) contacts do not significantly contribute to its crystal packing (Figure S5). On the other hand,  $\pi$ - $\pi$  stacking interactions ( $\text{Cg}\cdots\text{Cg}$ , 3.760 Å), represented by complementary blue and orange patches on the shape index surface (Figure S4), connect adjacent phenyl rings along the [001] direction (Figure S7). Moreover, the crystal structure of **(2)** also favours  $\text{C-H}\cdots\text{Sn}^{\text{II}}$  close contacts ( $\text{C-H}$ , 0.93 Å;  $\text{H}\cdots\text{Sn}$ , 3.21 Å;  $\text{C}\cdots\text{Sn}$ , 4.134 Å;  $\text{C-H}\cdots\text{Sn}$ , 173°) (Figure S5).

In **(3)**, one-dimensional polymeric chains propagate along the diagonal of the [011] plane (Figure 5). Neighbouring zigzag chains are interconnected by classical  $\text{O}(5)\cdots\text{H}(5)\cdots\text{O}(9)$  hydrogen bonds ( $\text{O-H}$ , 0.82 Å;  $\text{H}\cdots\text{O}$ , 1.89 Å;  $\text{O}\cdots\text{O}$ , 2.699 Å;  $\text{O-H}\cdots\text{O}$ , 167°) along the [010] direction (Figure S8). Furthermore, analysis of the Hirshfeld surface for **(3)** revealed that  $\text{H}\cdots\text{H}$  (3.8%),  $\text{C}\cdots\text{C}$  (1.8%),  $\text{H}\cdots\text{C}/\text{C}\cdots\text{H}$  (3.2%), and  $\text{Sn}\cdots\text{Sn}$  (0%) close contacts exhibit negligible contributions to its crystal arrangement (Figure S5).

Unlike **(1)** - **(3)**, our Hirshfeld surface analysis showed that isotropic  $\text{H}\cdots\text{H}$  contacts considerably contribute (17.9%) to the Hirshfeld surface area for **(4)** (Figure S5), a three-dimensional coordination network (Figures 6 and 7). Moreover, contribution of  $\text{Sn}\cdots\text{Sn}$  interactions to **(4)** is larger than that observed for **(1)** - **(3)** (Figure S5).

## References

- [1] M. A. Spackman and P. G. Byron, *Chem. Phys. Lett.*, 1997, **267**, 215–220.
- [2] M. A. Spackman and J. J. McKinnon, *Cryst. Eng. Comm.*, 2002, **4**, 378–392.
- [3] J. J. McKinnon, M. A. Spackman and A. S. Mitchell, *Acta Crystallogr., Sect. B: Struct. Sci.*, 2004, **60**, 627–668.
- [4] J. J. McKinnon, D. Jayatilaka and M. A. Spackman, *Chem. Commun.*, 2007, 3814–3816.
- [5] M. A. Spackman and D. Jayatilaka, *Cryst. Eng. Comm.*, 2009, **11**, 19–32.
- [6] M. A. Spackman, *Phys. Scr.*, 2013, **87**, 048103 (12pp).
- [7] S. K. Wolff, D. J. Grimwood, J. J. McKinnon, M. J. Turner, D. Jayatilaka and M. A. Spackman, *CrystalExplorer (Version 3.1)*, University of Western Australia, 2012.

## Supplementary Figures

**Figure S4.** Hirshfeld surfaces for the repeating units of **(1)** - **(4)** mapped with  $d_{\text{norm}}$  (top) and shape index (bottom).

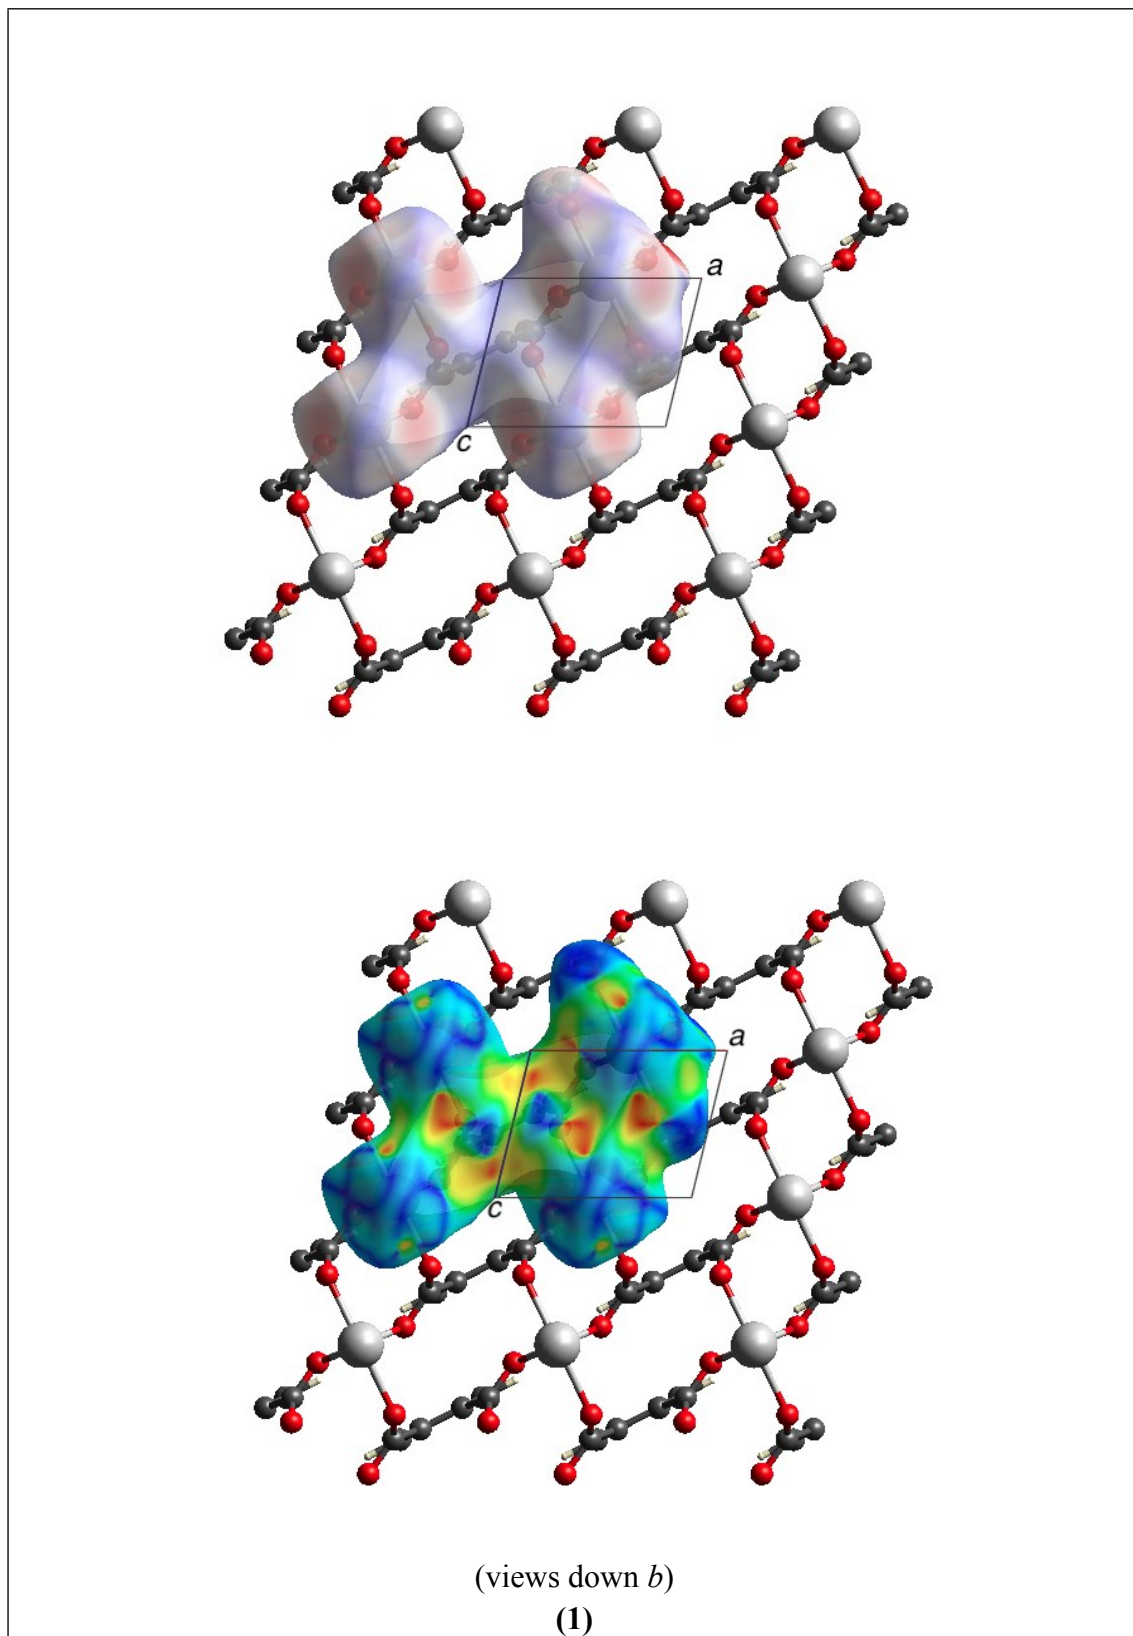

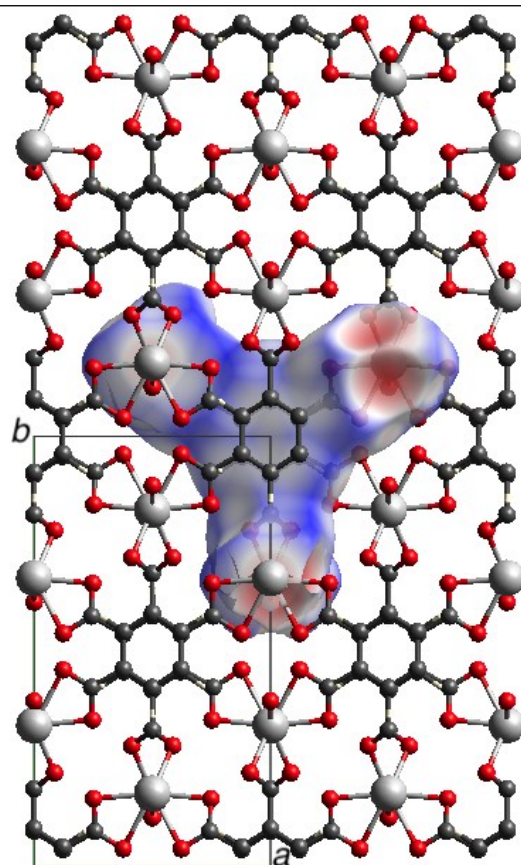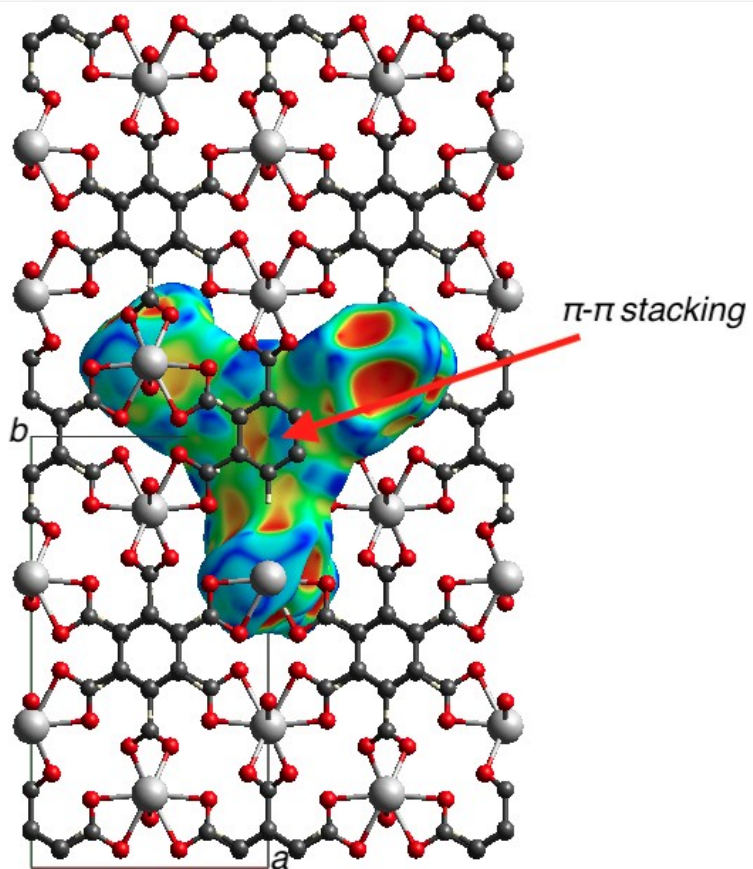

(views down  $c$ )

(2)

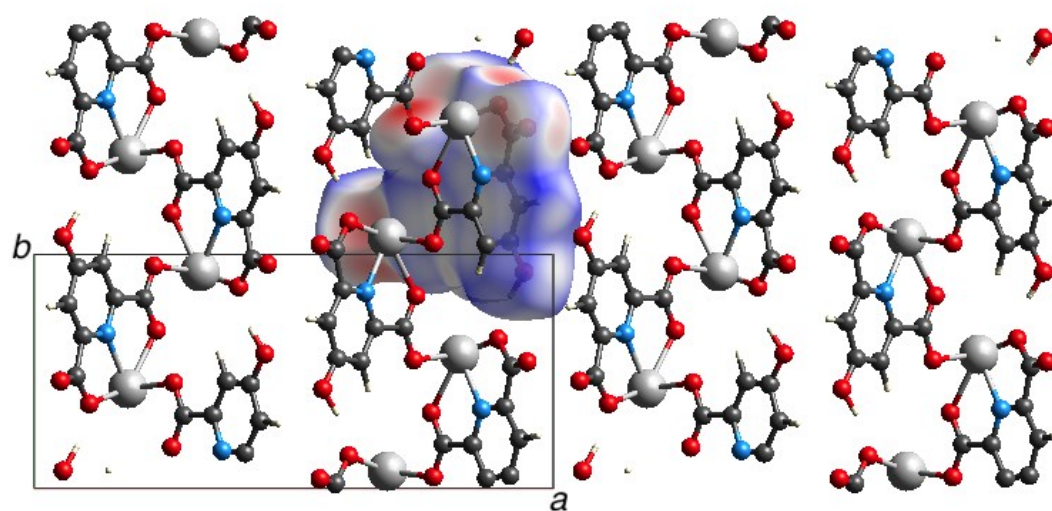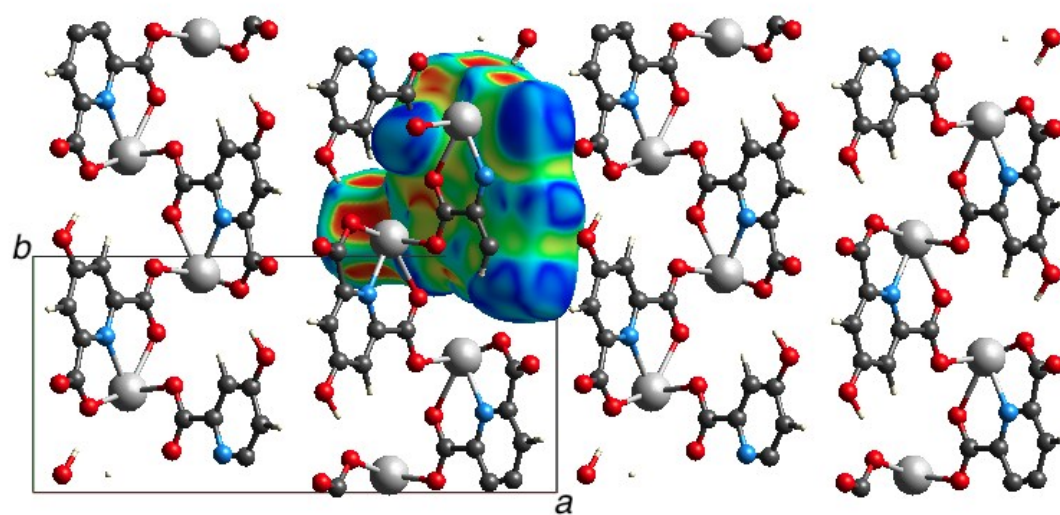

(views down c)

(3)



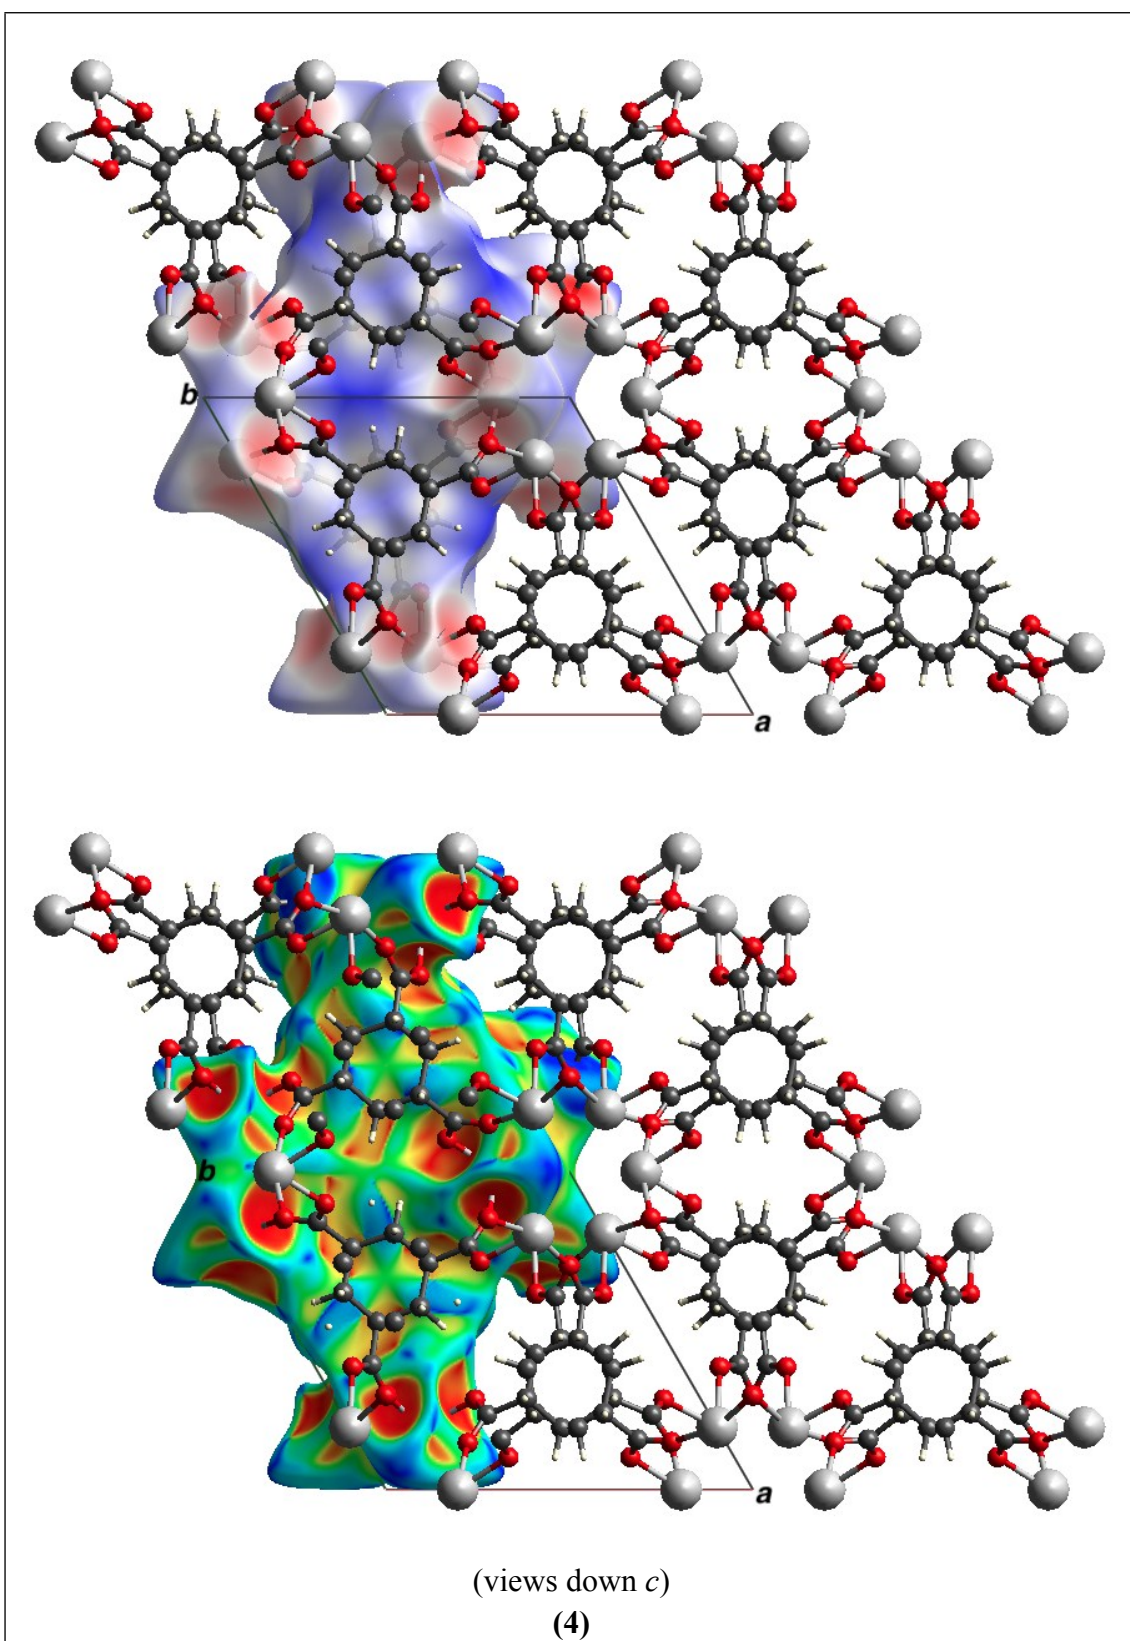

**Figure S5.** Contributions from specific pairs of atom-types to the Hirshfeld surfaces for the repeating units of **(1)** - **(4)**.

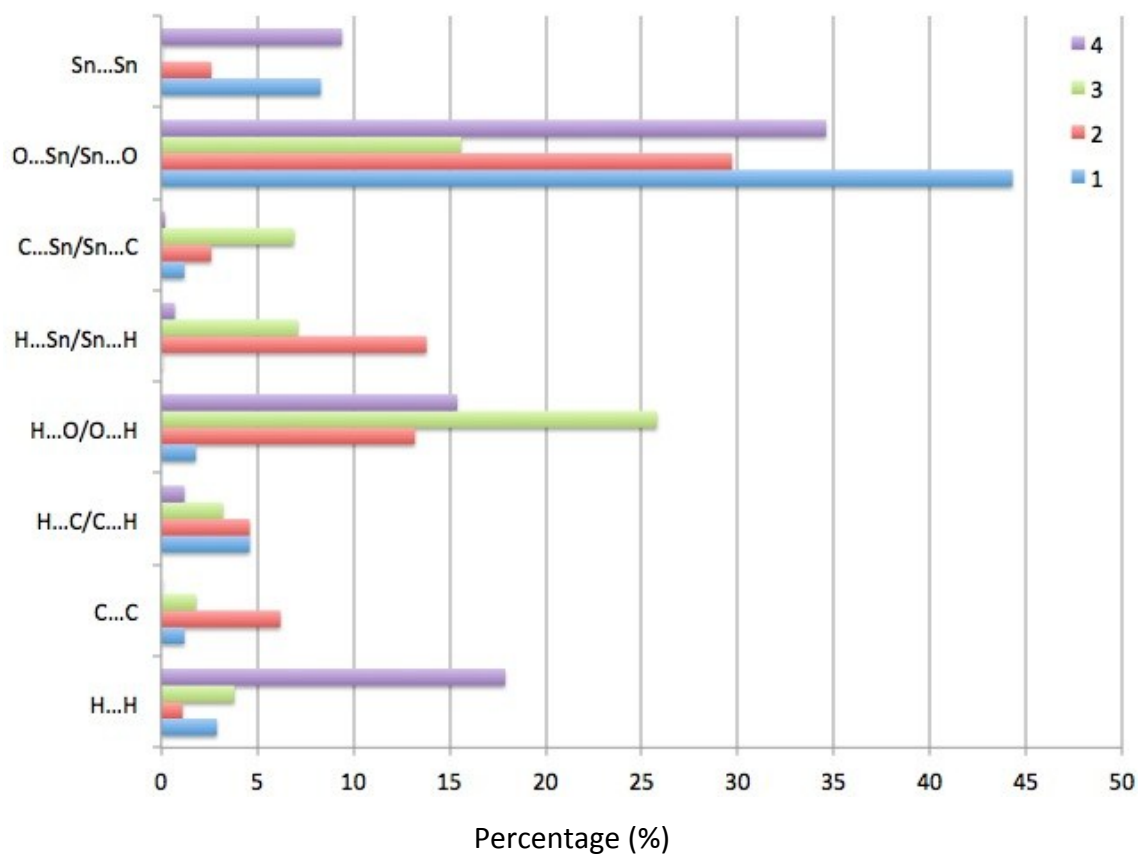

**Figure S6.** Packing diagram of **(1)** showing secondary Sn $\cdots$ O interactions along the [001] direction.<sup>a</sup>

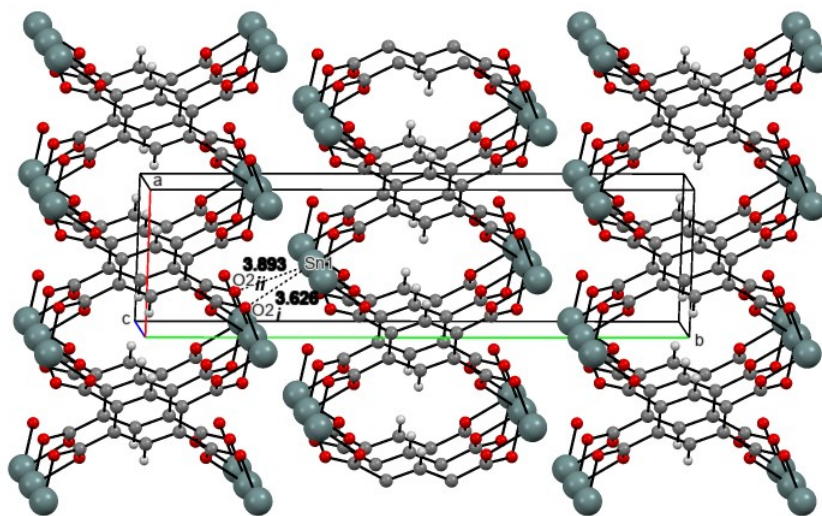

<sup>a</sup> Symmetry codes: (i) 0.5-x,0.5-y,-z; (ii) 0.5-x,0.5-y,1-z.



**Figure S7.** Packing diagrams of **(2)** showing  $\pi$ - $\pi$  stacking ( $\text{Cg} \cdots \text{Cg}^{\text{iii}}$ , 3.760 Å) interactions along the [001] direction. H atoms are omitted for clarity.<sup>a</sup>

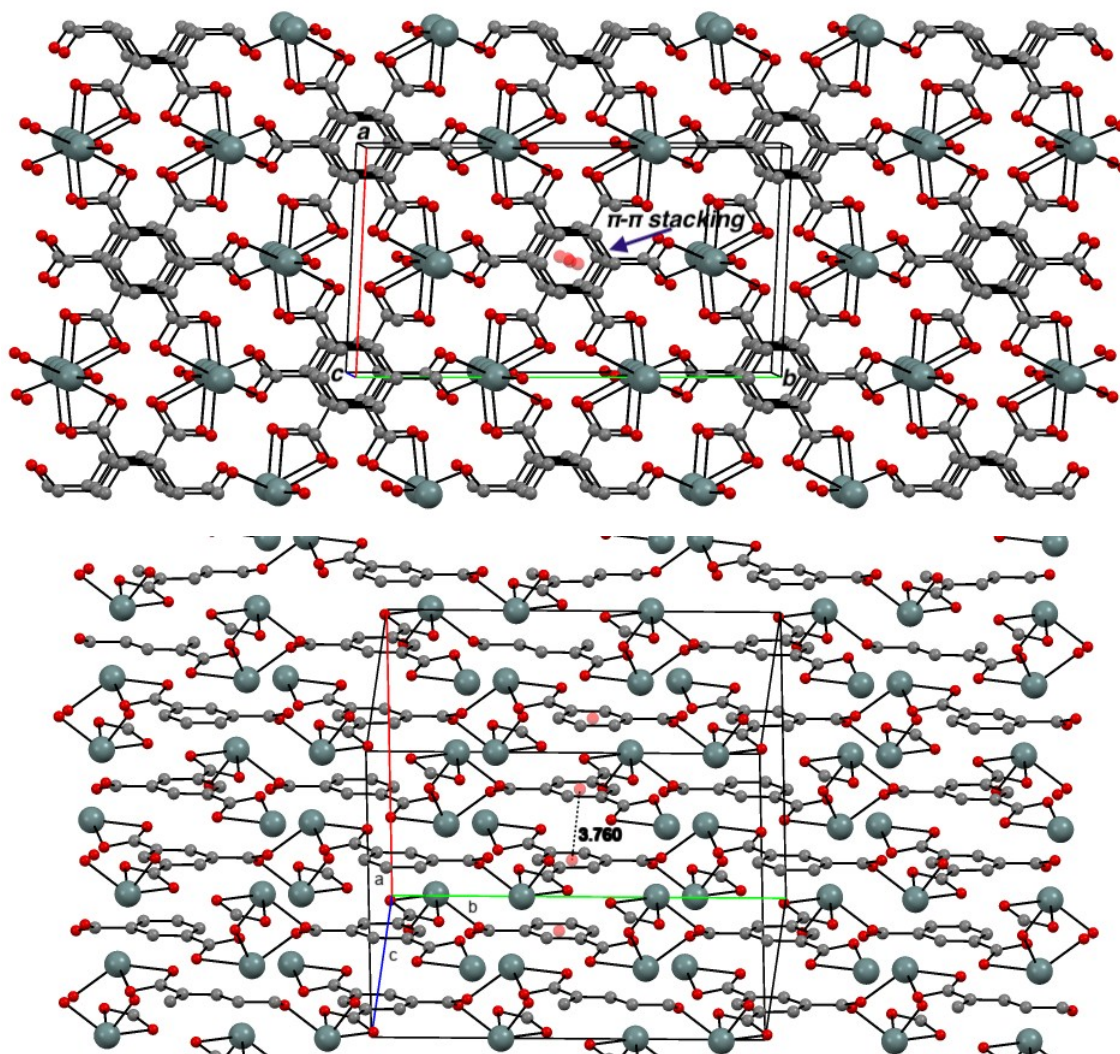

<sup>a</sup> Symmetry code: (iii)  $x, 1-y, -0.5+z$ .

**Figure S8.** Packing diagram of **(3)** highlighting O-H $\cdots$ O hydrogen bonds along the [010] direction.<sup>a</sup>

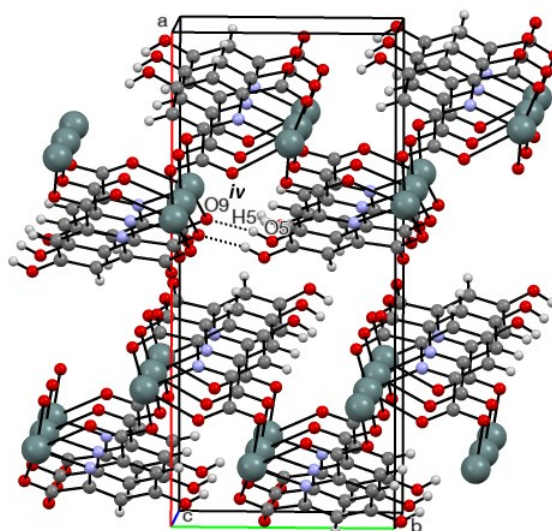

<sup>a</sup> Symmetry code: (iv)  $x, -1+y, z$ .
